# Supplementary material
Source: publisher figshare collection journal article supplement (https://tandf.figshare.com/ndownloader/files/14611775)
Supplement: Supplementary file 1 [file 14611775]

**Supporting Information for**

**Size, composition, morphology and health implications of airborne incidental metal-containing nanoparticles**

**Key Words:** Incidental nanoparticles, respiratory deposition curve, single particle analysis, fractal-like agglomerates, NP-collectors.

**Word count:** 515

**Supporting Information.** The SI contains the following information:

**Table S1.** Size separation is done using a nano-MOUDI cascade impactor and corresponding stages.

**Table S2.** LOQs and LODs of Al, Mn, Fe, Cu and Zn in nano-MOUDI substrates.

**Figure S1.** Comparison of the Fe (left) Mn, (middle) and Cu (right) concentrations between on-site and off-site nano-MOUDI measurements at the machining center during Day 2 (a) and Day 3 (b).

**Figure S2.** Comparison of the Fe (left) Mn, (middle) and Cu (right) concentrations between on-site and off-site nano-MOUDI measurements at the foundry during Day 1 (a) and Day 3 (b).

**Figure S3.** Composition of incidental particles observed at the machining center and the foundry. Percentage of the main metals found in the elemental analysis of the digested nano-MOUDI filters are summarized for samples collected during days 1, 2 and 3 for the machining center (a) and foundry (b). No data are shown if metals were present in concentrations lower than the corresponding LOD.

**Figure S4.** Low magnification SEM images of particles found at the machining center and the foundry for different size ranges including for particles collected by the nano-MOUDI stages 3 (3.2-5.6 $\mu$ m), 5 (1-1.8 $\mu$ m), 7 (320-560nm) and 9 (100-180nm) at the machining center (a) and the foundry (b).

**Figure S5.** SEM-EDS of particles found on the machining center and the foundry. The SEM image is compared to the Fe, O, Mn, and Cu elemental mappings for both sites in nano-MOUDI stage 7 (320-560nm). Zn, and Mg were also found and mapped in the foundry.

**Table SI.** Size separation is done using a nano-MOUDI cascade impactor and corresponding stages.

| Stage              | $d_{50}$ ,<br>nm | Midpoint<br>diameter ( $d_i$ ),<br>nm | Substrate material             |
|--------------------|------------------|---------------------------------------|--------------------------------|
| 1                  | 10000            | 15000                                 | Polycarbonate                  |
| 2                  | 5600             | 7800                                  | Polycarbonate                  |
| 3                  | 3200             | 4400                                  | Polycarbonate                  |
| 4                  | 1800             | 2500                                  | Polycarbonate                  |
| 5                  | 1000             | 1400                                  | Polycarbonate                  |
| 6                  | 560              | 780                                   | Polycarbonate                  |
| 7                  | 320              | 440                                   | Polycarbonate                  |
| 8                  | 180              | 250                                   | Polycarbonate                  |
| 9                  | 100              | 140                                   | Polycarbonate                  |
| 10                 | 59               | 79.5                                  | Polycarbonate                  |
| 11                 | 32               | 45.5                                  | Polycarbonate                  |
| 12                 | 18               | 25                                    | Polycarbonate                  |
| 13                 | 10               | 14                                    | Polycarbonate                  |
| 14<br>Final filter | <10              | 6                                     | Mixed cellulose ester<br>(MCE) |

**Table SII.** LOQs and LODs of Al, Mn, Fe, Cu and Zn in nano-MOUDI substrates.

| Technique | Substrate | Al                       |                          | Mn                       |                          | Fe                       |                          | Cu                       |                          | Zn                       |                          |
|-----------|-----------|--------------------------|--------------------------|--------------------------|--------------------------|--------------------------|--------------------------|--------------------------|--------------------------|--------------------------|--------------------------|
|           |           | LOQ<br>( $\mu\text{g}$ ) | LOD<br>( $\mu\text{g}$ ) |
| ICP-MS    | PCTE      | 0.801                    | 0.473                    | 0.071                    | 0.054                    | 1.849                    | 1.335                    | 0.039                    | 0.012                    | 1.703                    | 1.429                    |
|           | MCE       | 0.730                    | 0.333                    | 0.071                    | 0.057                    | 0.417                    | 0.125                    | 0.031                    | 0.009                    | 0.782                    | 0.621                    |
| FP-XRF    | PCTE      | N. M.                    | N. M.                    | N. D.                    | 0.94*                    | N. D.                    | 0.93*                    | 4.52                     | 3.38                     | N. D.                    | 0.40*                    |
|           | MCE       | N. M.                    | N. M.                    | N. D.                    | 1.61*                    | 10.47                    | 4.82                     | N. D.                    | 1.61*                    | N. D.                    | 1.61*                    |

N. M. = Not measured, N. D. = Not detected, \*= Based on the LOD from the instrument.

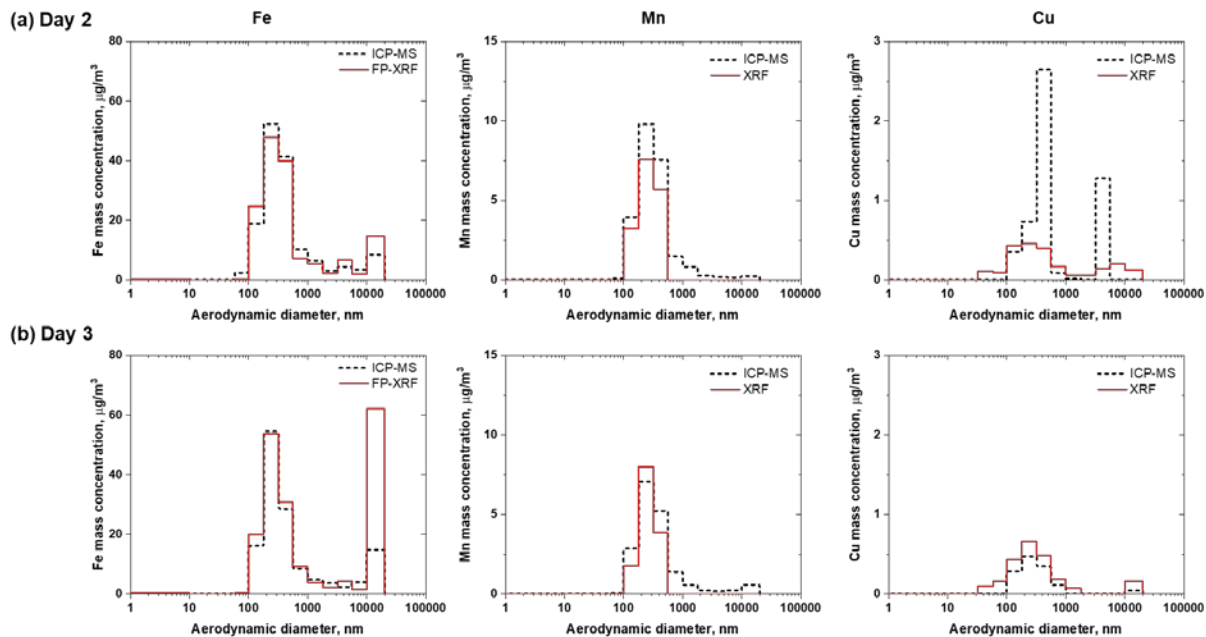

**Figure S1.** Comparison of the Fe (left) Mn, (middle) and Cu (right) concentrations between on-site and off-site nano-MOUDI measurements at the machining center during Day 2 (a) and Day 3 (b).

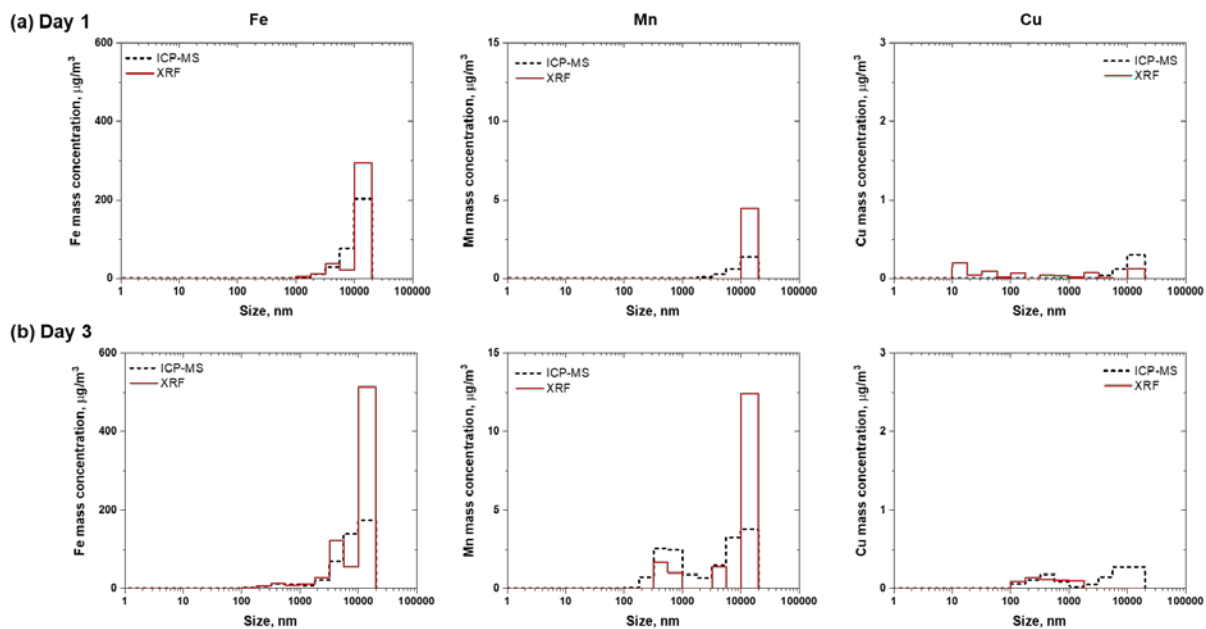

**Figure S2.** Comparison of the Fe (left) Mn, (middle) and Cu (right) concentrations between on-site and off-site nano-MOUDI measurements at the foundry during Day 1 (a) and Day 3 (b).

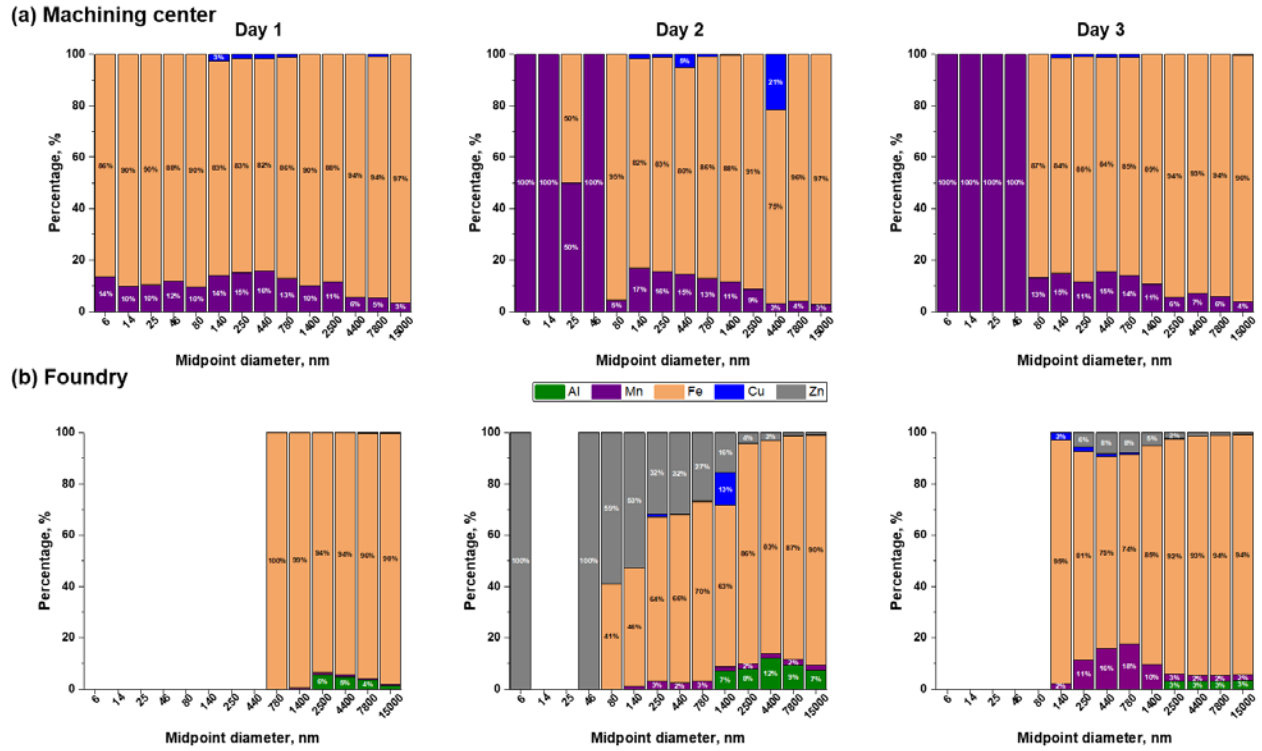

**Figure S3.** Composition of incidental particles observed at the machining center and the foundry. Percentage of the main metals found in the elemental analysis of the digested nano-MOUDI filters are summarized for samples collected during days 1, 2 and 3 for the machining center (a) and foundry (b). No data are shown if metals were present in concentrations lower than the corresponding LOD.

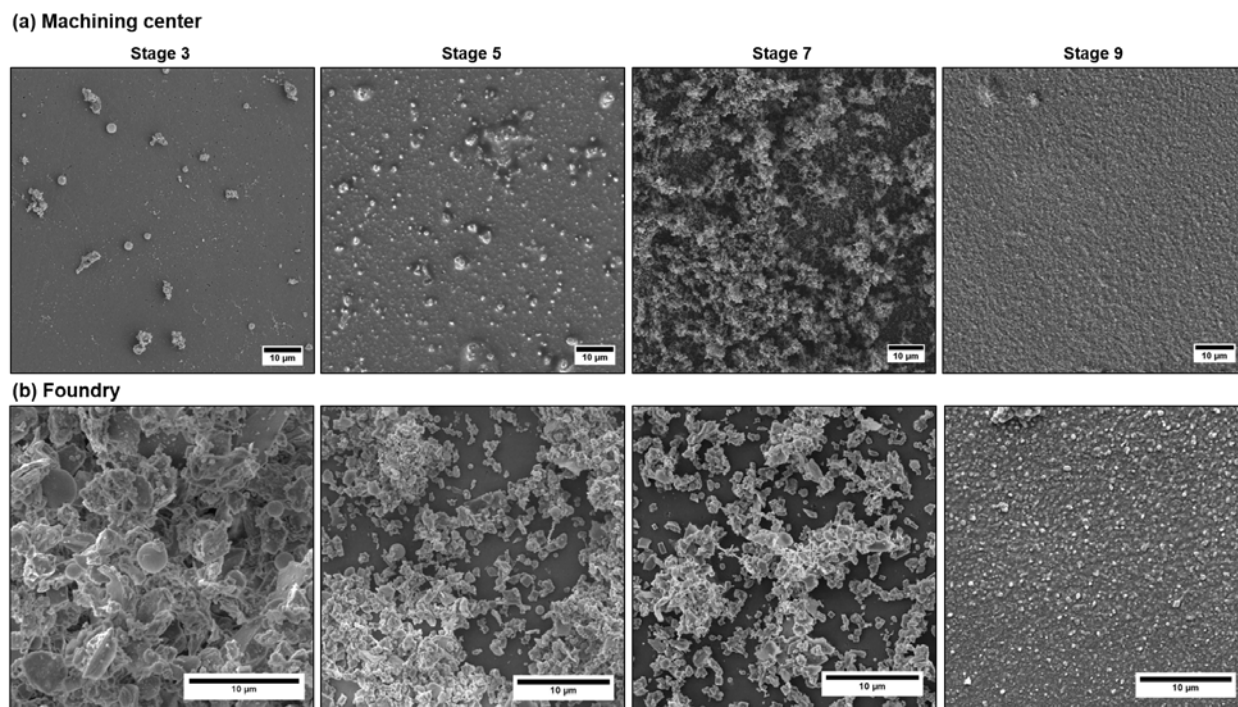

**Figure S4.** Low magnification SEM images of particles found at the machining center and the foundry for different size ranges including for particles collected by the nano-MOUDI stages 3 (3.2-5.6µm), 5 (1-1.8µm), 7 (320-560nm) and 9 (100-180nm) at machining center (a) and the foundry (b).

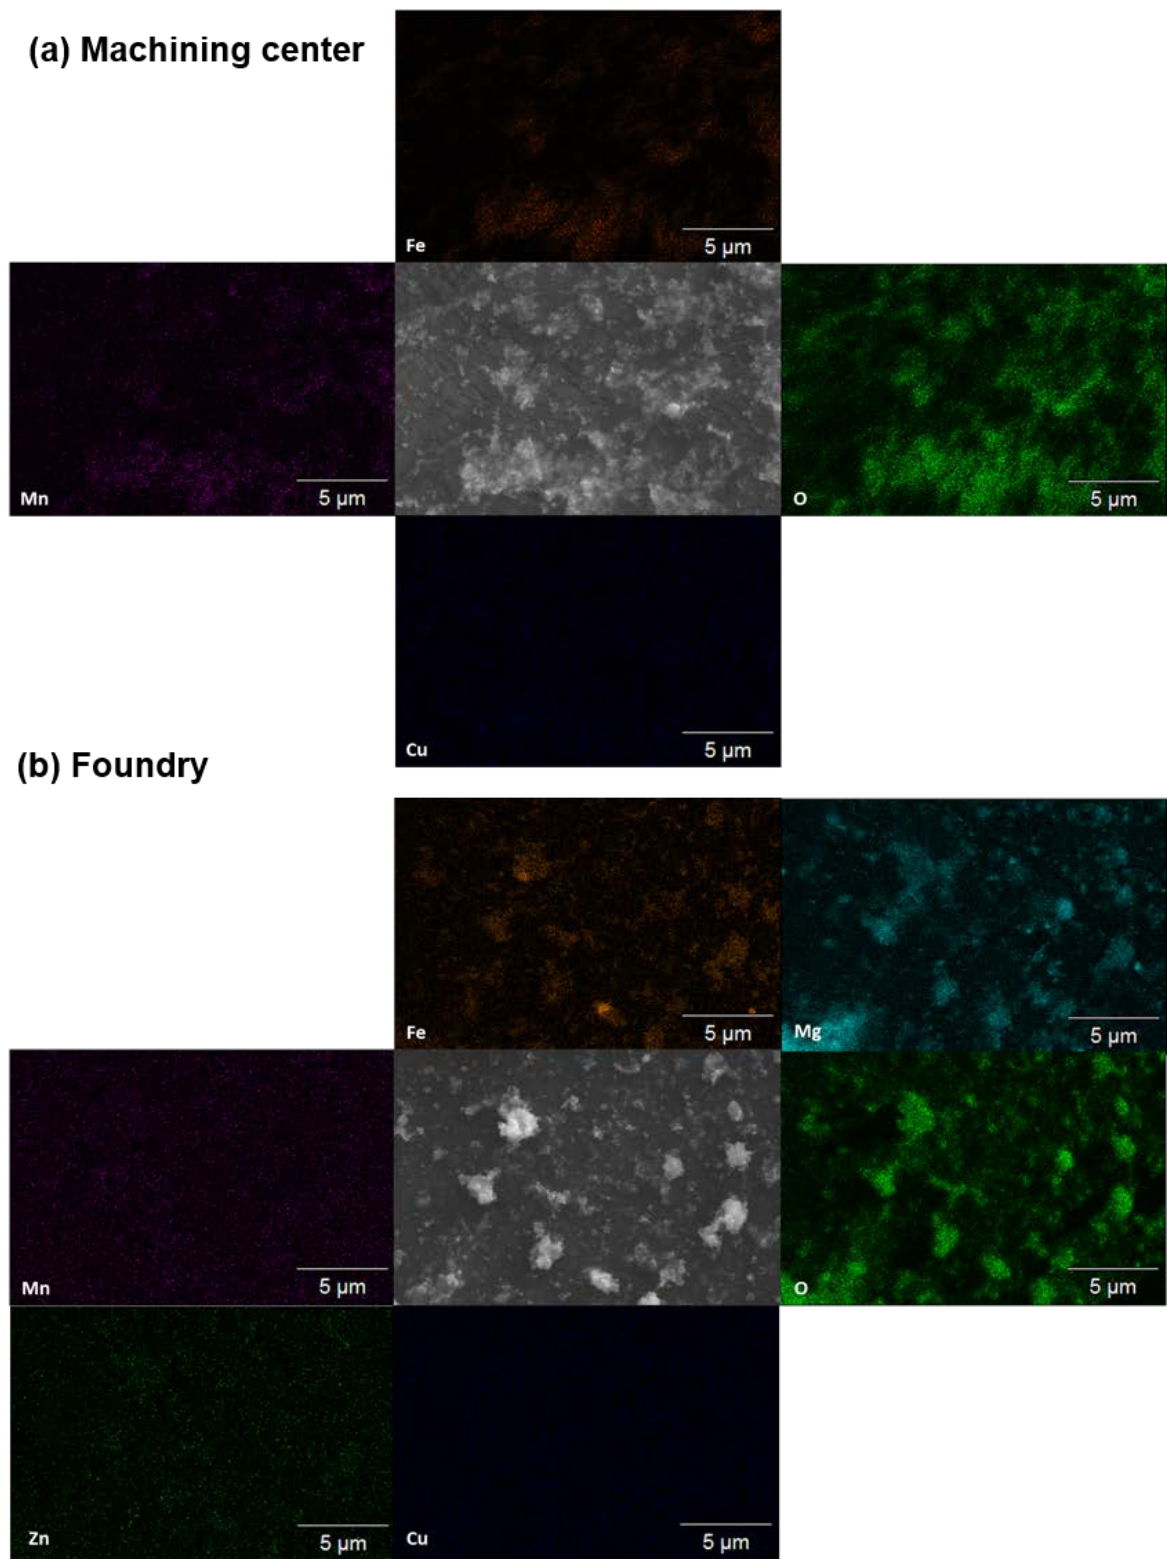

**Figure S5.** SEM-EDS of particles found on the machining center and the foundry. The SEM image is compared to the Fe, O, Mn, and Cu elemental mappings for both sites in nano-MOUDI stage 7 (320-560nm). Zn, and Mg were also found and mapped in the foundry.
